# Supplementary material for: Induction of secondary metabolism of Aspergillus terreus ATCC 20542 in the batch bioreactor cultures
Source: PubMed Central journal article supplement (PMC4786612; doi:10.1007/s00253-015-7157-1), 2015-11-25
Supplement: 253_2015_7157_MOESM1_ESM.pdf [file 253_2015_7157_MOESM1_ESM.pdf]

## **Supplementary material**

### **Applied Microbiology and Biotechnology**

**“Induction of secondary metabolism of *Aspergillus terreus* ATCC 20542 in the batch bioreactor cultures”**

**Tomasz Boruta<sup>\*</sup>, Marcin Bizukojc**

Lodz University of Technology

Faculty of Process and Environmental Engineering

Department of Bioprocess Engineering

ul. Wolczanska 213, 90-924 Lodz, Poland

<sup>\*</sup> Corresponding author. Phone: +48 42 631 39 77; fax: +48 42 636 56 63.

E-mail address: tomaszboruta85@gmail.com

## Table of contents

|                                                                                               |   |
|-----------------------------------------------------------------------------------------------|---|
| Fig. S1 ESI+ (a) and ESI- (b) mass spectra of (+)-bisdechlorogeodin                           | 3 |
| Fig. S2 ESI+ (a) and ESI- (b) mass spectra of (+)-erdin                                       | 3 |
| Fig. S3 ESI+ (a) and ESI- (b) mass spectra of (+)-geodin                                      | 3 |
| Fig. S4 ESI+ (a) and ESI- (b) mass spectra of 3 $\alpha$ -hydroxy-3,5-dihydromonacolin L acid | 4 |
| Fig. S5 ESI- mass spectrum of aspulvinone E                                                   | 4 |
| Fig. S6 ESI+ (a) and ESI- (b) mass spectra of asterric acid                                   | 4 |
| Fig. S7 ESI- mass spectra of butyrolactone I                                                  | 5 |
| Fig. S8 ESI+ (a) and ESI- (b) mass spectra of demethylasterric acid                           | 5 |
| Fig. S9 ESI+ (a) and ESI- (b) mass spectra of desmethylsulochrin                              | 5 |
| Fig. S10 ESI+ mass spectrum of dihydroisoflavipucine                                          | 6 |
| Fig. S11 ESI+ (a) and ESI- (b) mass spectra of 4a,5-dihydromevinolinic acid                   | 6 |
| Fig. S12 ESI+ (a) and ESI- (b) mass spectra of mevinolinic acid                               | 6 |
| Fig. S13 ESI+ (a) and ESI- (b) mass spectra of questin                                        | 7 |
| Fig. S14 Mass spectra of sulochrin                                                            | 7 |
| Fig. S15 ESI+ mass spectra of terrein                                                         | 8 |

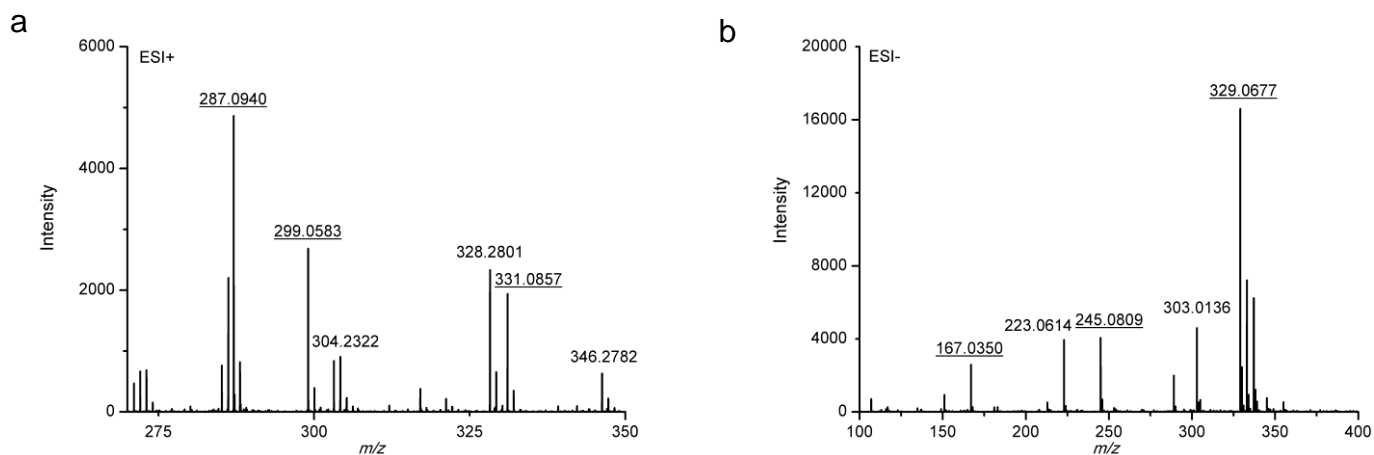

**Fig. S1** ESI+ (a) and ESI- (b) mass spectra of (+)-bisdechlorogedin. The  $m/z$  values of the peaks corresponding to (+)-bisdechlorogedin are underlined

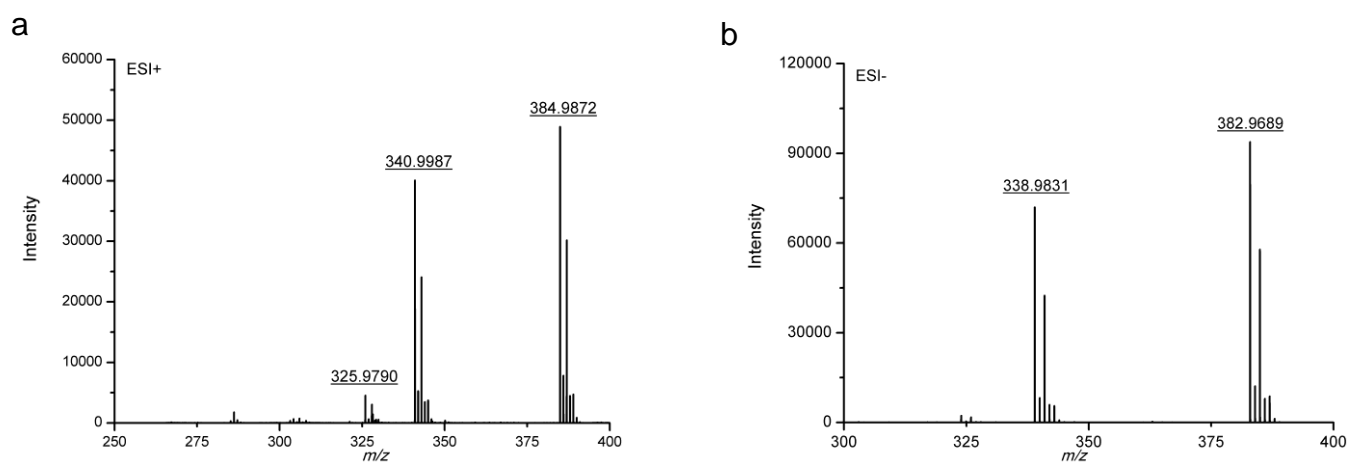

**Fig. S2** ESI+ (a) and ESI- (b) mass spectra of (+)-erdin. The  $m/z$  values of the peaks corresponding to (+)-erdin are underlined

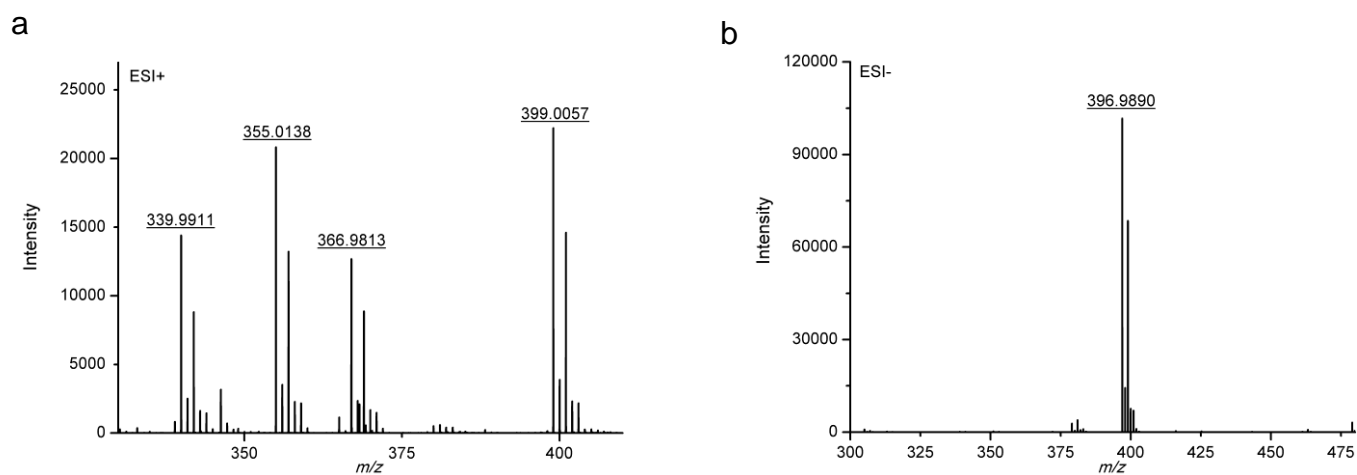

**Fig. S3** ESI+ (a) and ESI- (b) mass spectra of (+)-geodin. The  $m/z$  values of the peaks corresponding to (+)-geodin are underlined

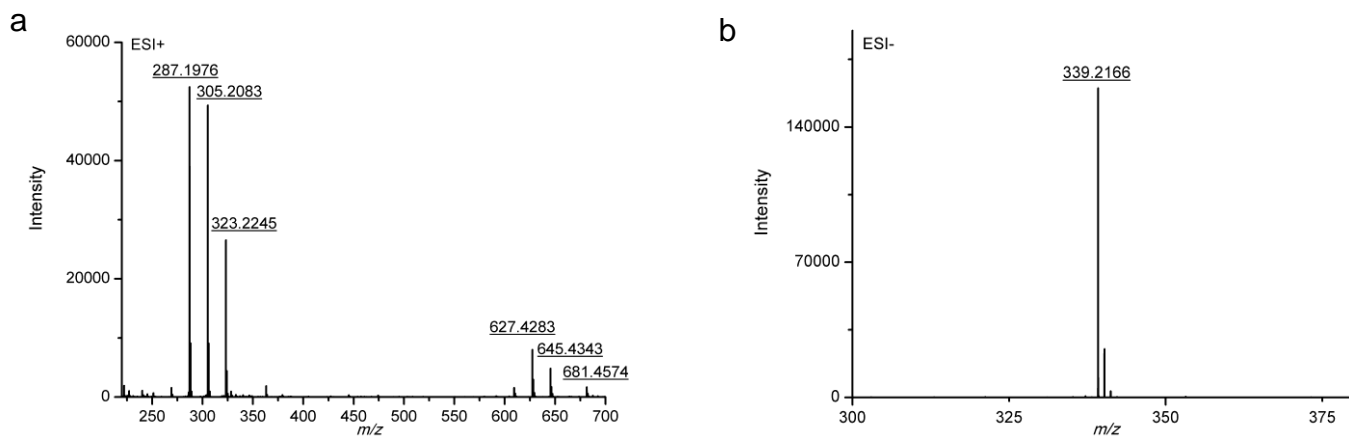

**Fig. S4 ESI+ (a) and ESI- (b) mass spectra of 3 $\alpha$ -hydroxy-3,5-dihydromonacolin L acid.** The  $m/z$  values of the peaks corresponding to 3 $\alpha$ -hydroxy-3,5-dihydromonacolin L acid are underlined

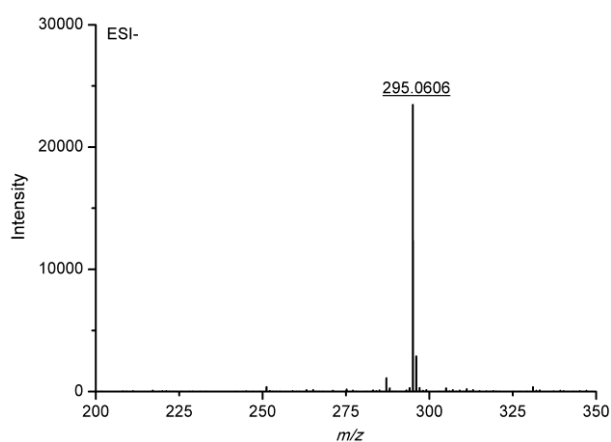

**Fig. S5 ESI- mass spectrum of aspulvinone E.** The  $m/z$  value of the peak corresponding to aspulvinone E is underlined

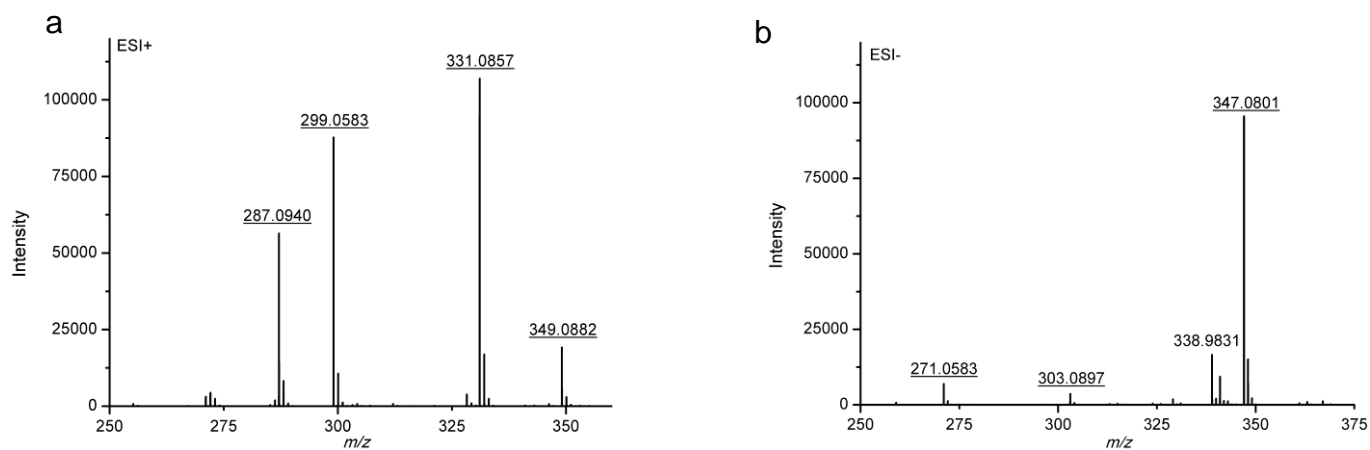

**Fig. S6 ESI+ (a) and ESI- (b) mass spectra of astringic acid.** The  $m/z$  values of the peaks corresponding to astringic acid are underlined

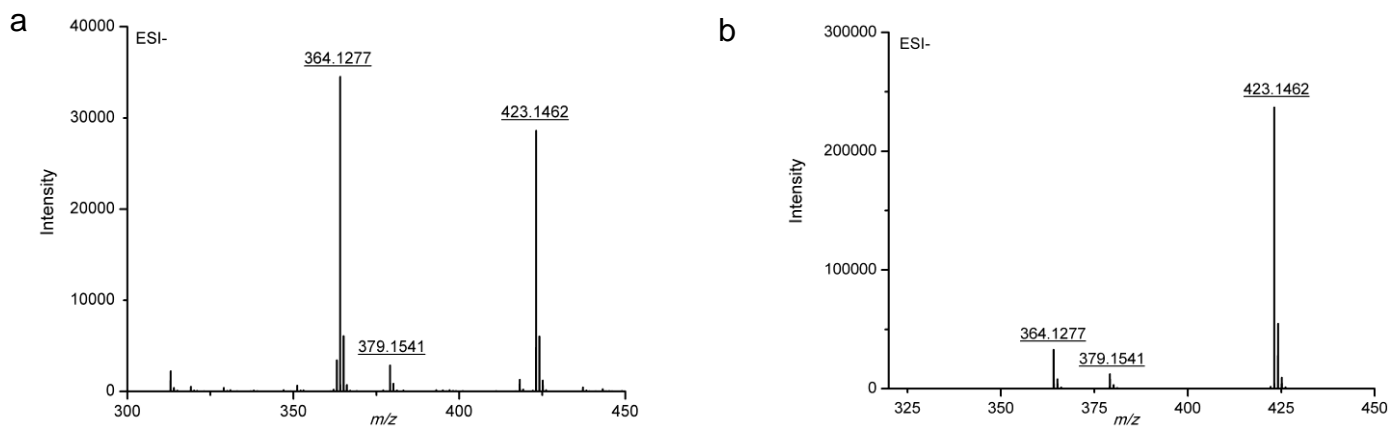

**Fig. S7 ESI- mass spectra of butyrolactone I.** The  $m/z$  values of the peaks corresponding to butyrolactone I are underlined. (a) mass spectrum obtained for the analyzed sample; (b) mass spectrum obtained for the standard solution

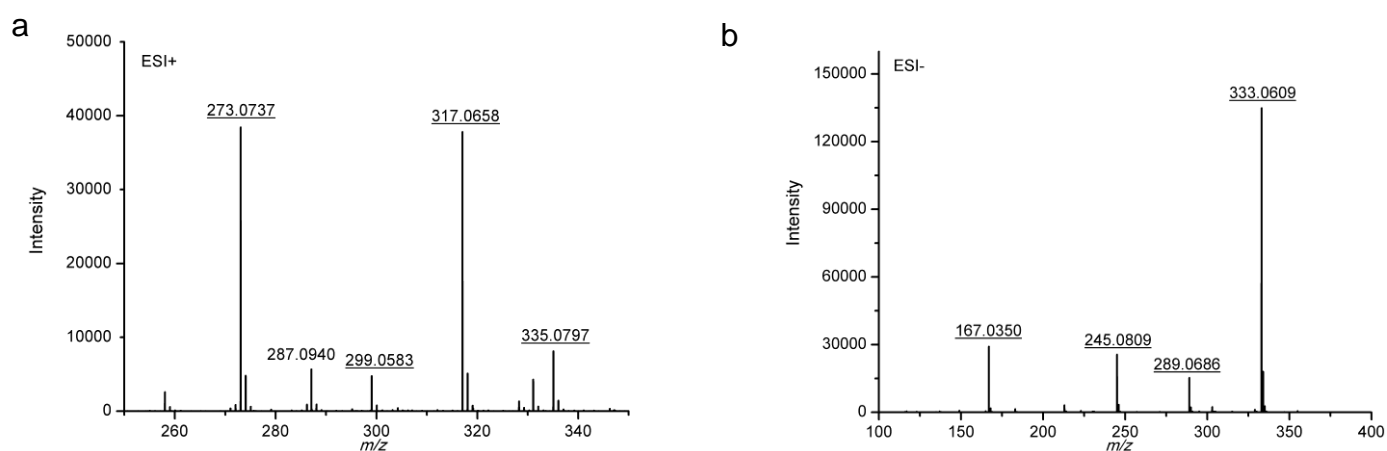

**Fig. S8 ESI+ (a) and ESI- (b) mass spectra of demethylasterric acid.** The  $m/z$  values of the peaks corresponding to demethylasterric acid are underlined

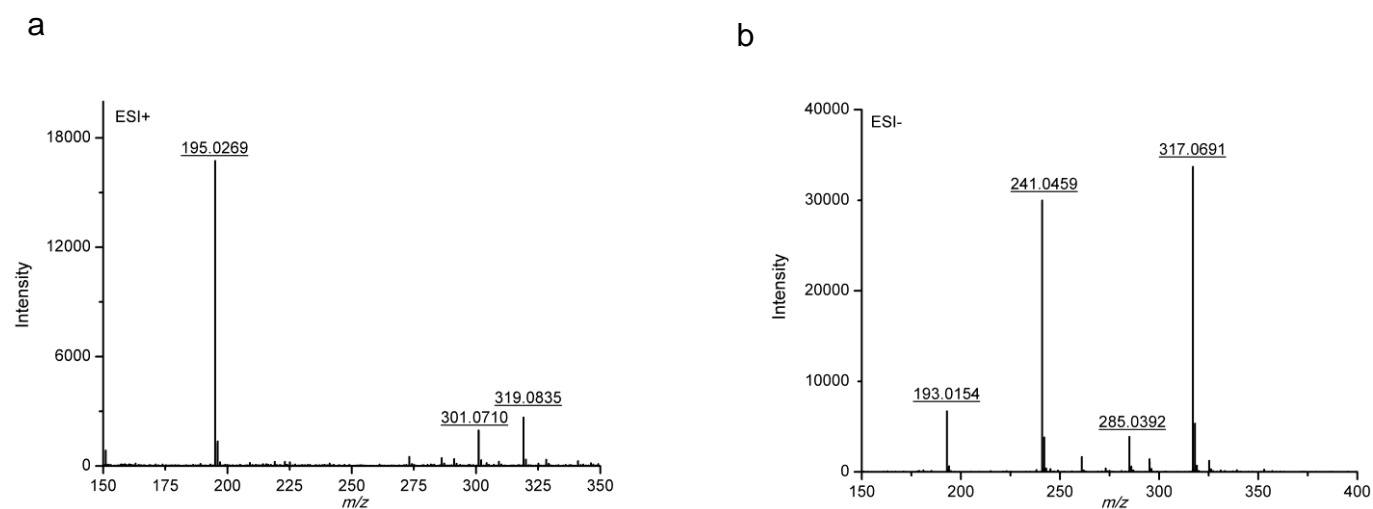

**Fig. S9 ESI+ (a) and ESI- (b) mass spectra of desmethylsulochrin.** The  $m/z$  values of the peaks corresponding to desmethylsulochrin are underlined

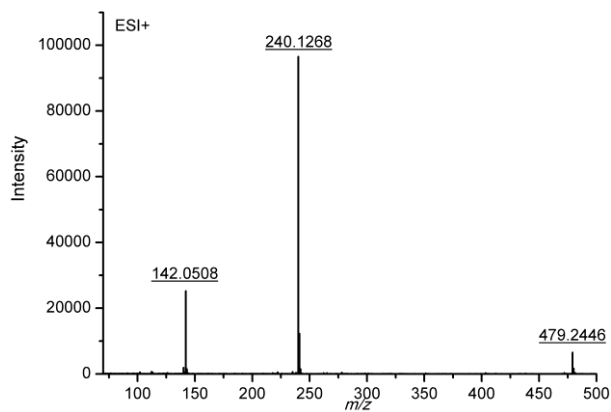

**Fig. S10** ESI+ mass spectrum of dihydroisoflavipucine. The  $m/z$  values of the peaks corresponding to dihydroisoflavipucine are underlined

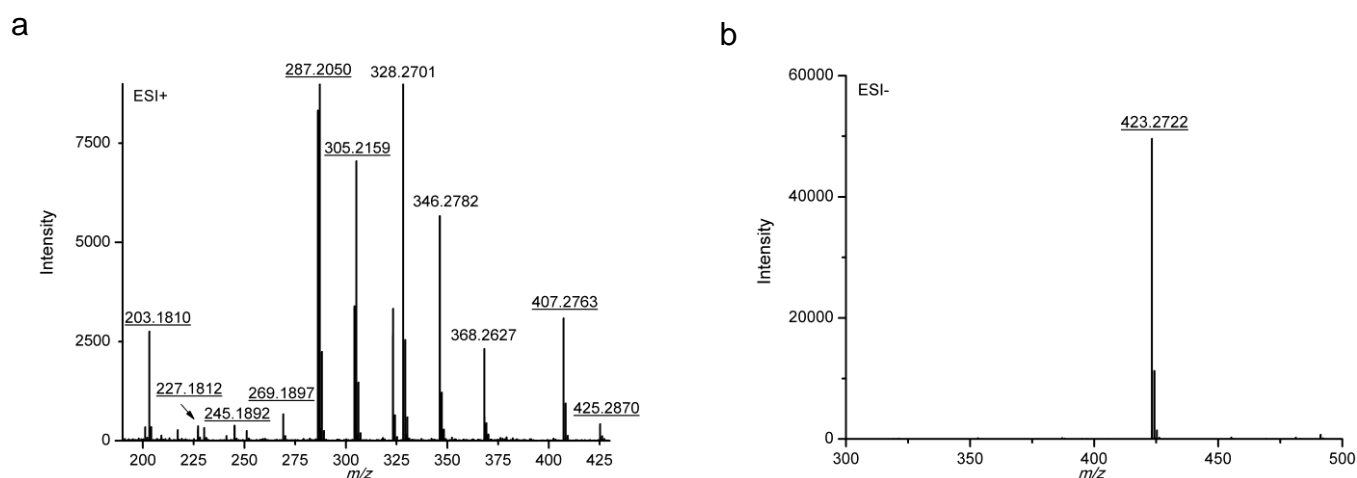

**Fig. S11** ESI+ (a) and ESI- (b) mass spectra of 4a,5-dihydromevinolinic acid. The  $m/z$  values of the peaks corresponding to 4a,5-dihydromevinolinic acid are underlined

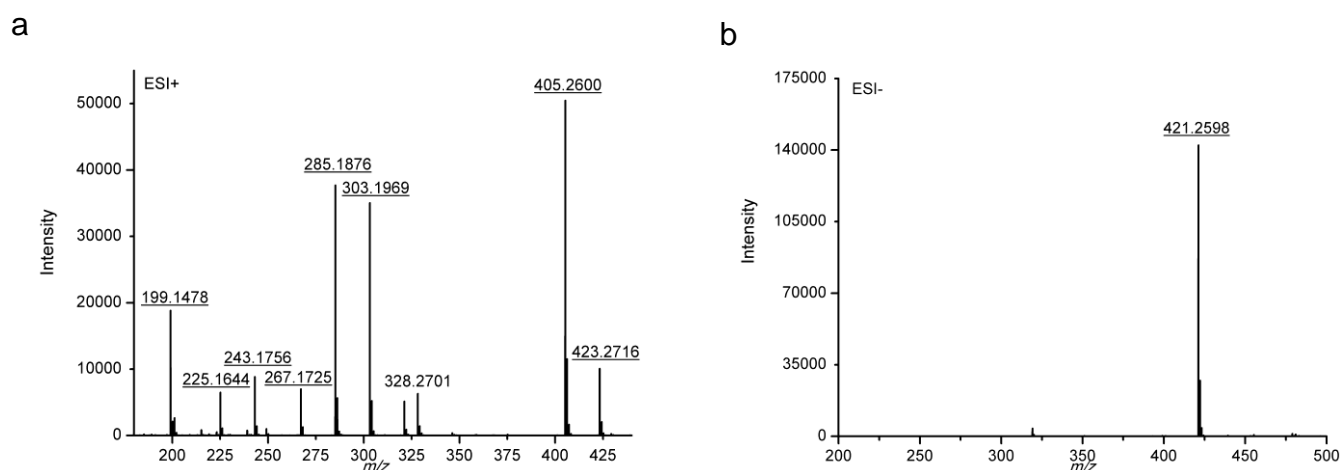

**Fig. S12** ESI+ (a) and ESI- (b) mass spectra of mevinolinic acid. The  $m/z$  values of the peaks corresponding to mevinolinic acid are underlined

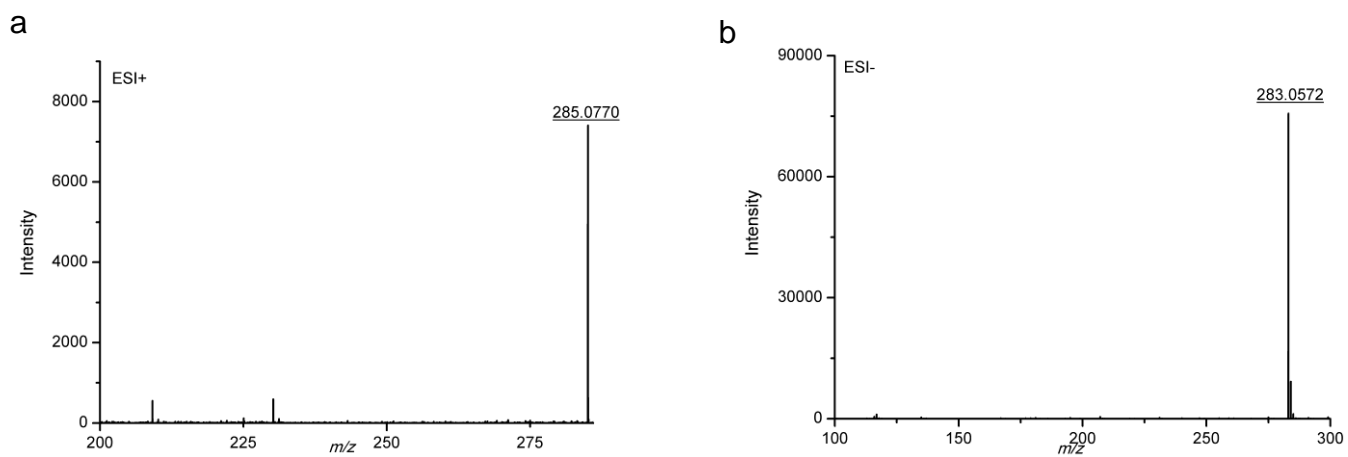

**Fig. S13 ESI+ (a) and ESI- (b) mass spectra of questin.** The  $m/z$  values of the peaks corresponding to questin are underlined

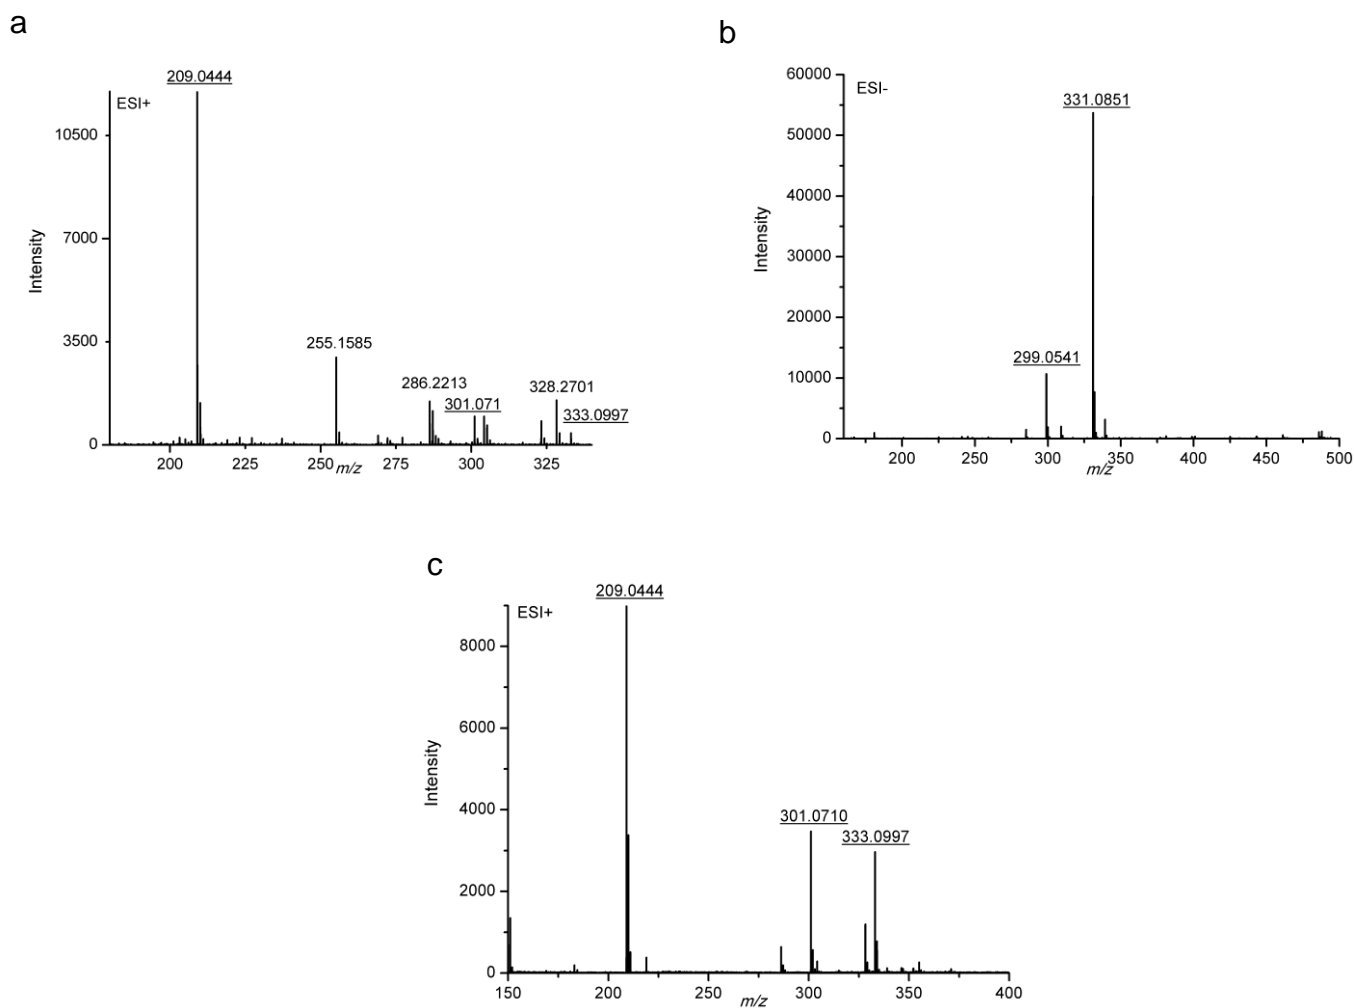

**Fig. S14 Mass spectra of sulochrin.** The  $m/z$  values of the peaks corresponding to sulochrin are underlined. (a) ESI+ mass spectrum obtained for the analyzed sample; (b) ESI- mass spectrum obtained for the analyzed sample (c) ESI+ mass spectrum obtained for the standard solution

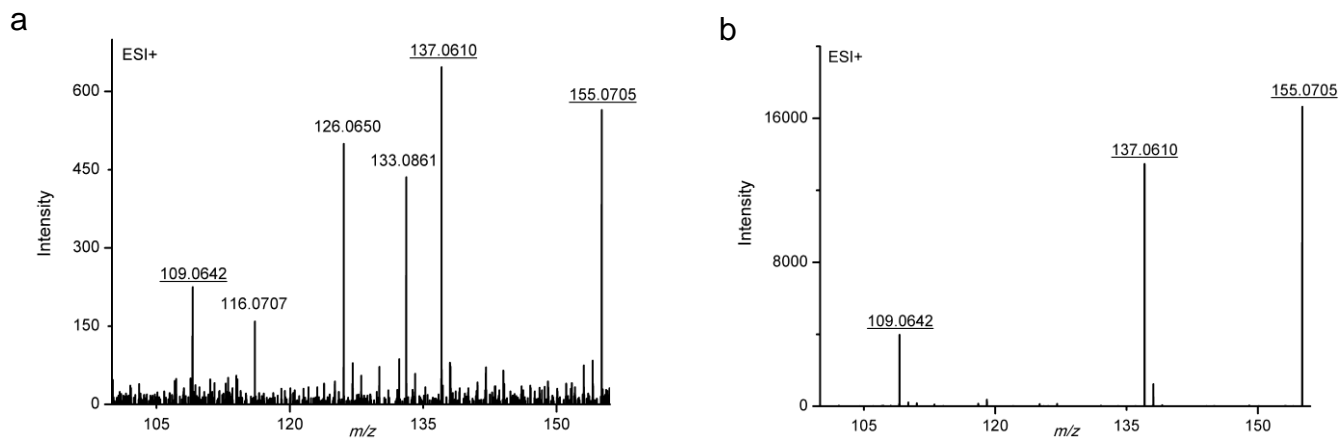

**Fig. S15 ESI+ mass spectra of terrein.** The  $m/z$  values of the peaks corresponding to terrein are underlined. (a) mass spectrum obtained for the analyzed sample; (b) mass spectrum obtained for the standard solution
